# Supplementary figures and images for: Sherloc: a comprehensive refinement of the ACMG–AMP variant classification criteria
Source: PubMed Central journal article supplement — Genet Med. 2017 May 11;19(10):1105–17. doi: 10.1038/gim.2017.37 (PMC5632818; doi:10.1038/gim.2017.37), 2017-05-11

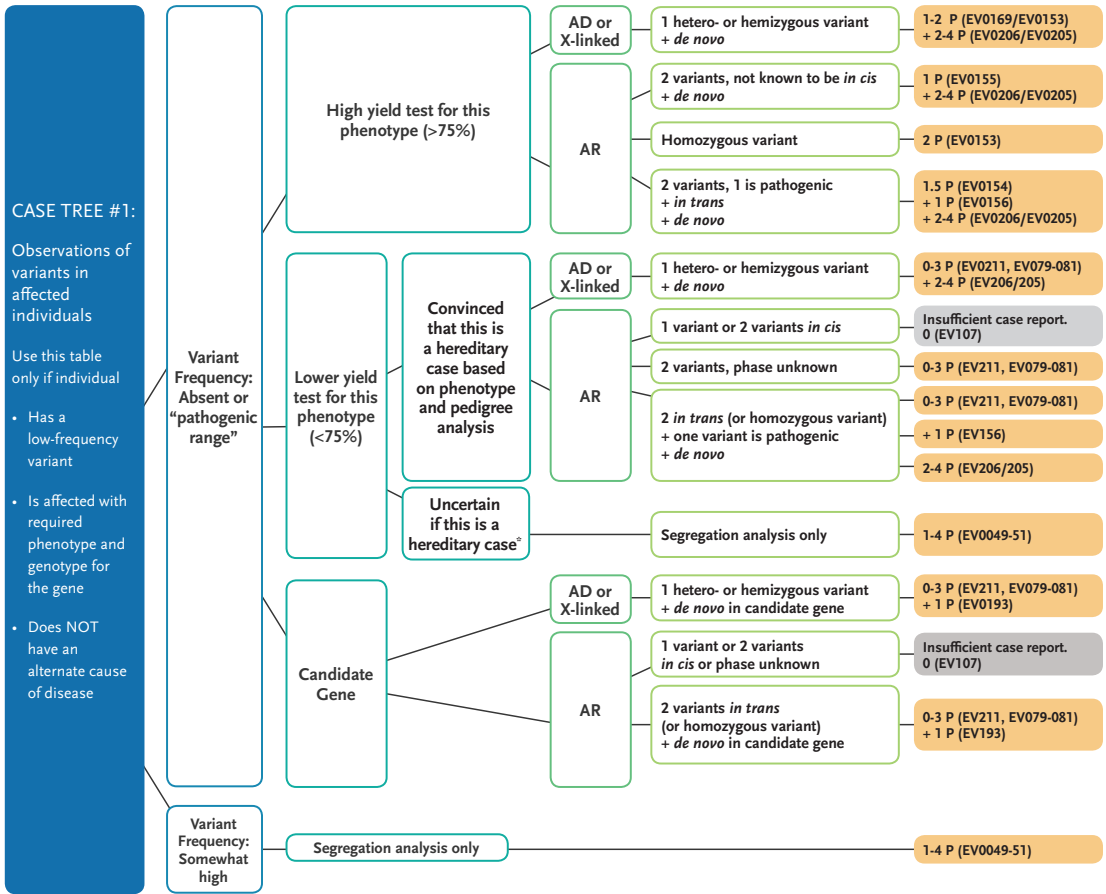

Supplement: gim201737x1.pdf [file gim201737x1.pdf]

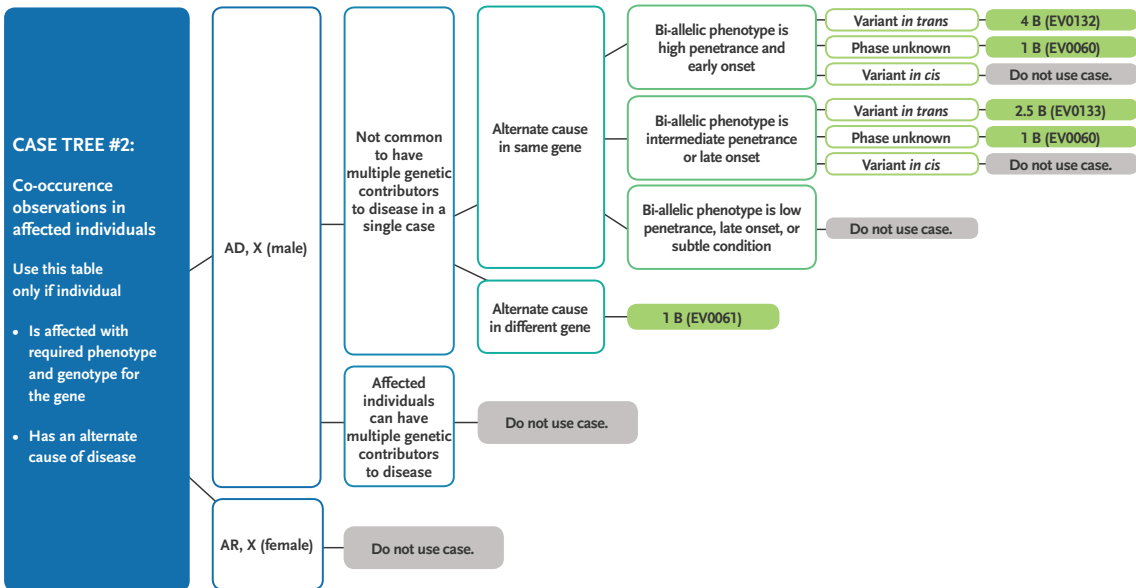

Supplement: gim201737x2.pdf [file gim201737x2.pdf]

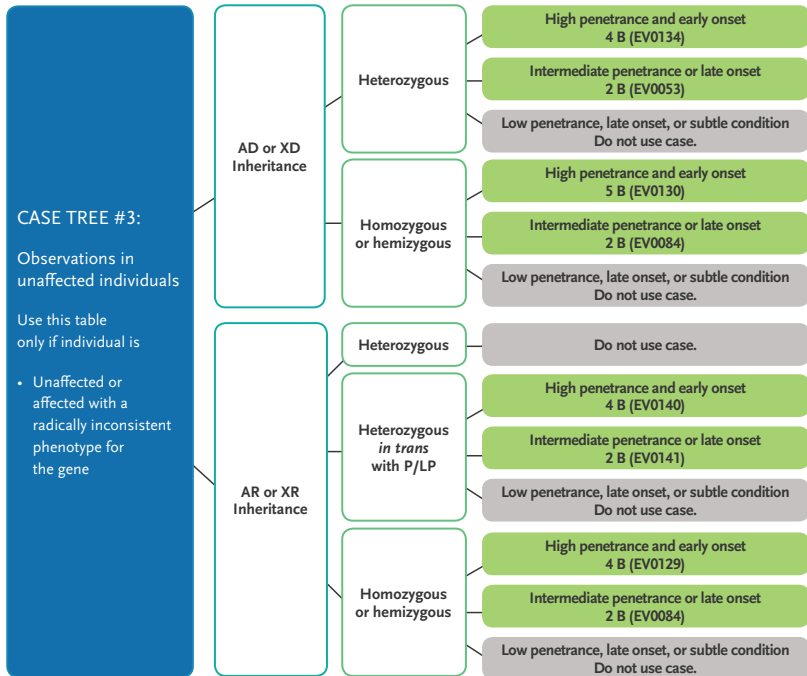

Supplement: gim201737x3.pdf [file gim201737x3.pdf]

Variant effect on gene product

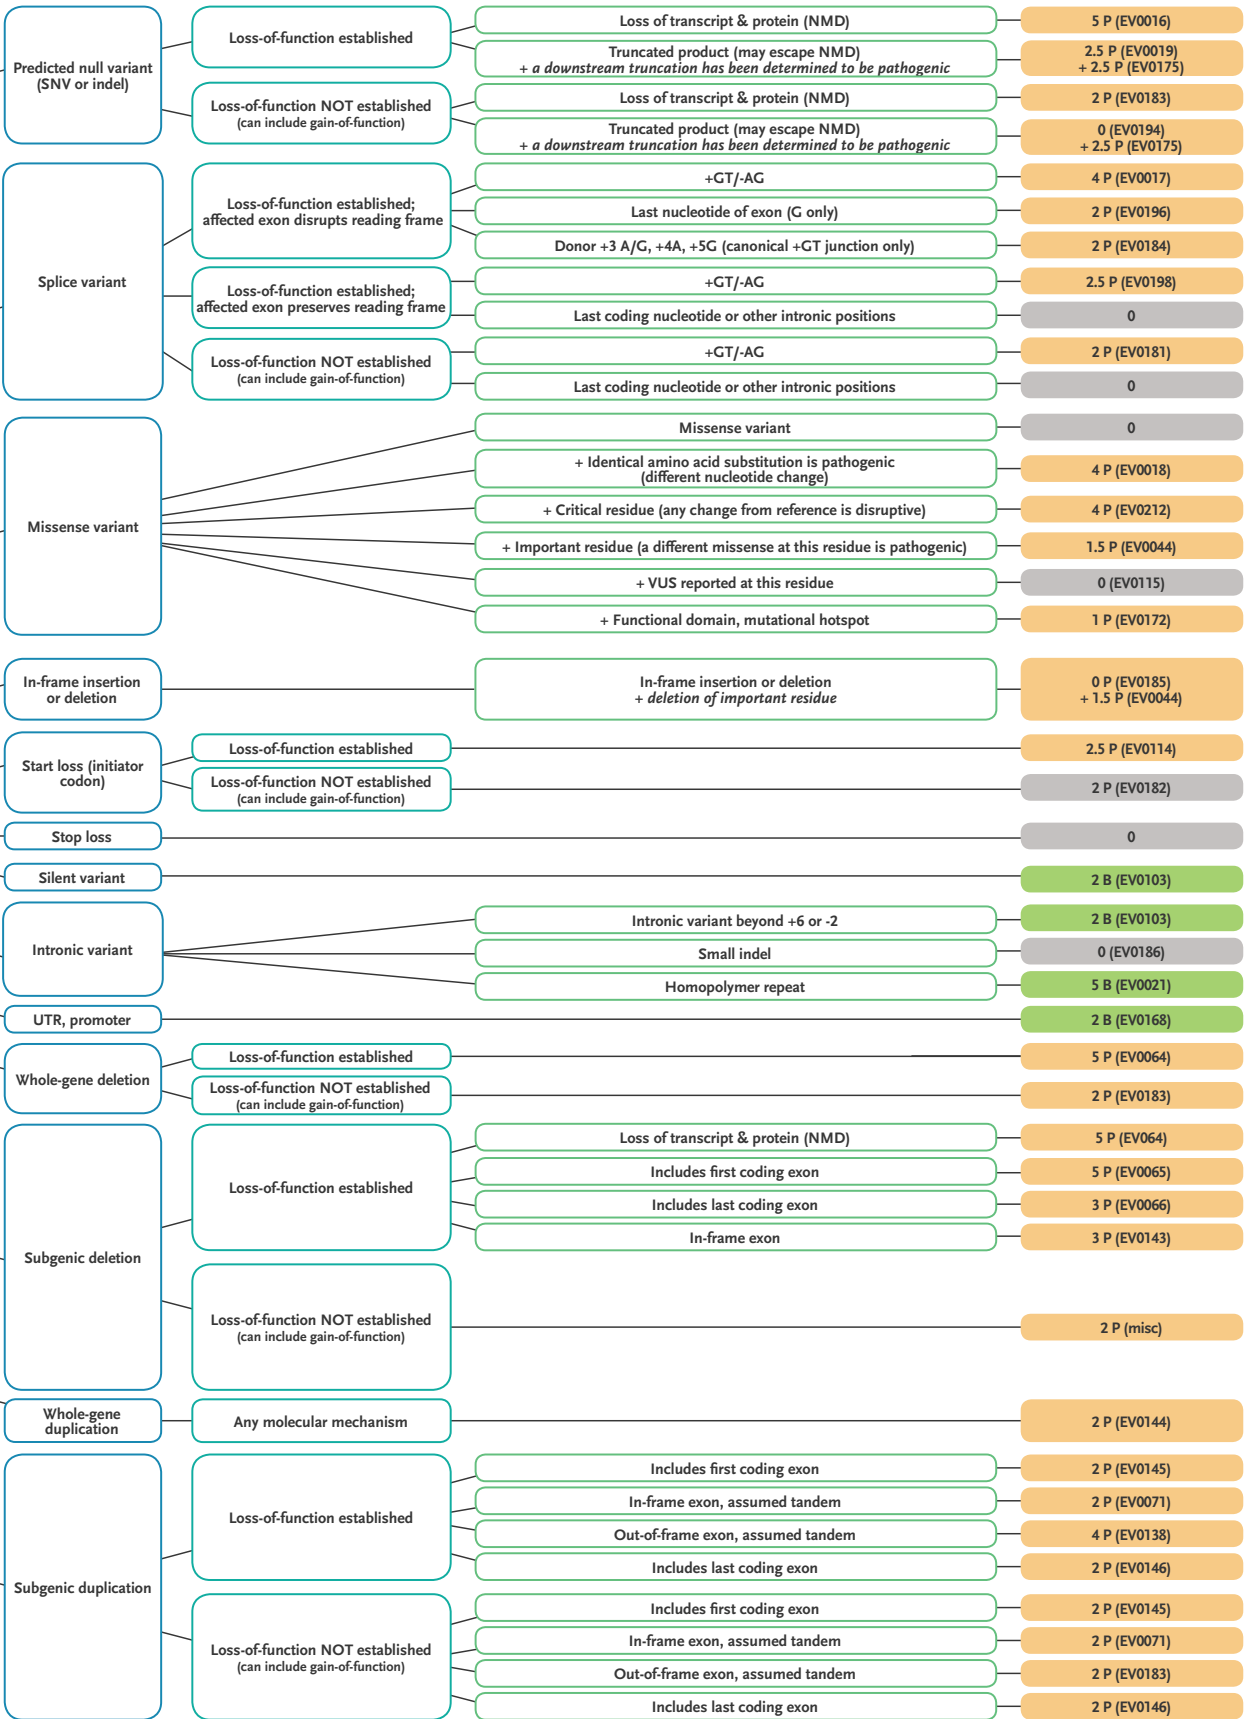

Supplement: gim201737x4.pdf [file gim201737x4.pdf]

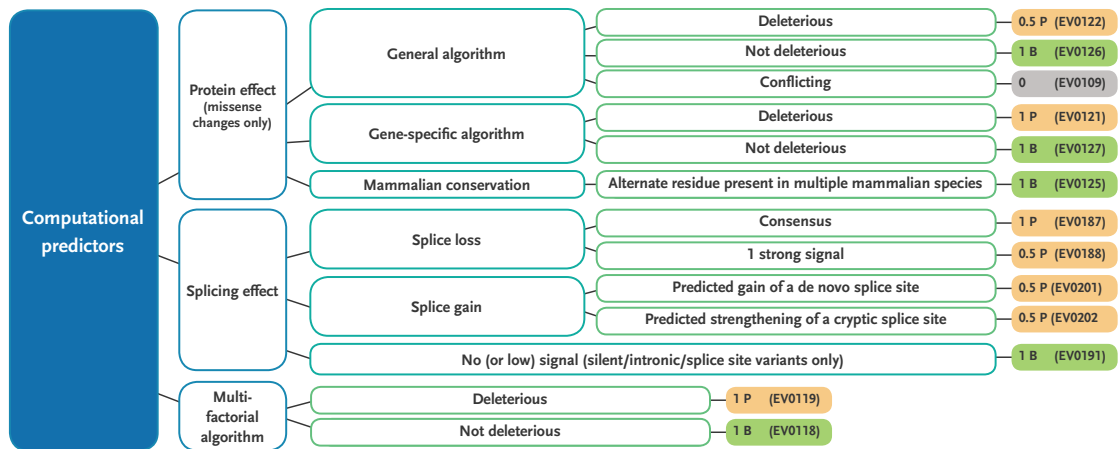

Supplement: gim201737x5.pdf [file gim201737x5.pdf]
